# Supplementary material for: Acetyltransferases GCN5 and PCAF are Required for B Cell Maturation in Mice
Source: Preprints.org preprint supplement (doi:10.20944/preprints202112.0231.v1), 2021-12-14
Supplement: Supplementary file 1 [file supplementary]

Supplementary Figures 1 and 2

Aceltransferases GCN5 and PCAF are required for B cell maturation in mice

Valentyn Oksenych1,2,3,4,5,*

| **Citation:**  Academic Editor: Firstname Lastname  Received: date  Accepted: date  Published: date  **Publisher’s Note:** MDPI stays neutral with regard to jurisdictional claims in published maps and institutional affiliations.  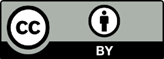  **Copyright:** © 2021 by the authors. Submitted for possible open access publication under the terms and conditions of the Creative Commons Attribution (CC BY) license (https://creativecommons.org/licenses/by/4.0/). |
| --- |

1 Department for Cancer Research and Molecular Medicine (IKOM), Norwegian University of Science and Technology, Laboratory Center, Erling Skjalgssons gate 1, 7491 Trondheim, Norway; [valentyn.oksenych@ntnu.no](mailto:valentyn.oksenych@ntnu.no)

2 KG Jebsen Centre for B Cell Malignancies, Institute of Clinical Medicine, University of Oslo, N-0316 Oslo, Norway;

3 Institute of Clinical Medicine, University of Oslo, 0318 Oslo, Norway; [valentyn.oksenych@medisin.uio.no](mailto:valentyn.oksenych@medisin.uio.no)

4 The NNF Center for Protein Research, Faculty of Health and Medical Sciences, University of Copenhagen, Blegdamsvej 3B, 2200 Copenhagen, Denmark

5 Department of Biosciences and Nutrition (BioNut), Karolinska Institutet, 14183 Huddinge, Sweden

***** Correspondence: Valentyn Oksenych [valentyn.oksenych@medisin.uio.no](mailto:valentyn.oksenych@medisin.uio.no)

*Corresponding author: valentyn.oksenych@medisin.uio.no (Valentyn Oksenych)

**Supplementary Figure S1. Detection of GCN5, PCAF and histones using western blot**

**
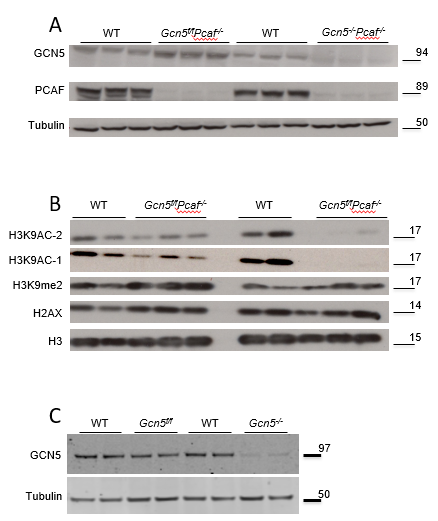
**

**Supplementary Figure S1. Detection of GCN5, PCAF and histones.**

**(A)** Detection of GCN5 and PCAF in primary murine B cells of indicated genotype. GCN5 signal is absent in the *Gcn5-/-* cells. PCAF signal is absent in the *Pcaf-/-* cells. Tubulin was used as a loading control.

**(B)** Western blot detecting Histones H3, H2AX, H3K9me2, H3K9ac (two different antibodies). H3K9Ac signal is missing in the cells lacking both GCN5 and PCAF.

**(C)** Detection of GCN5 and PCAF in primary murine B cells of indicated genotype. GCN5 signal is absent in the *Gcn5-/-* cells.

**Supplementary Figure S2. Detection of developing B cells in mice of indicated genotypes using flow cytometry**

**
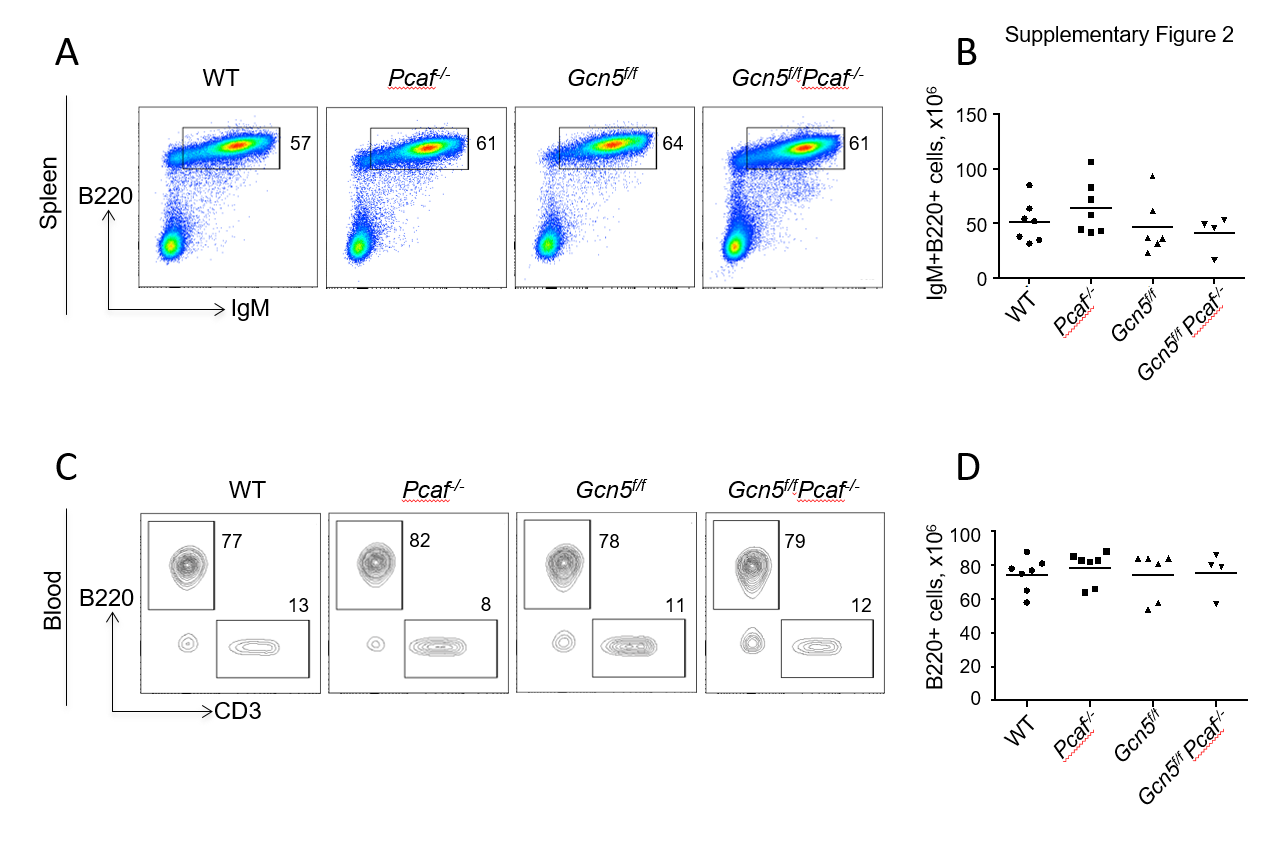
**

**
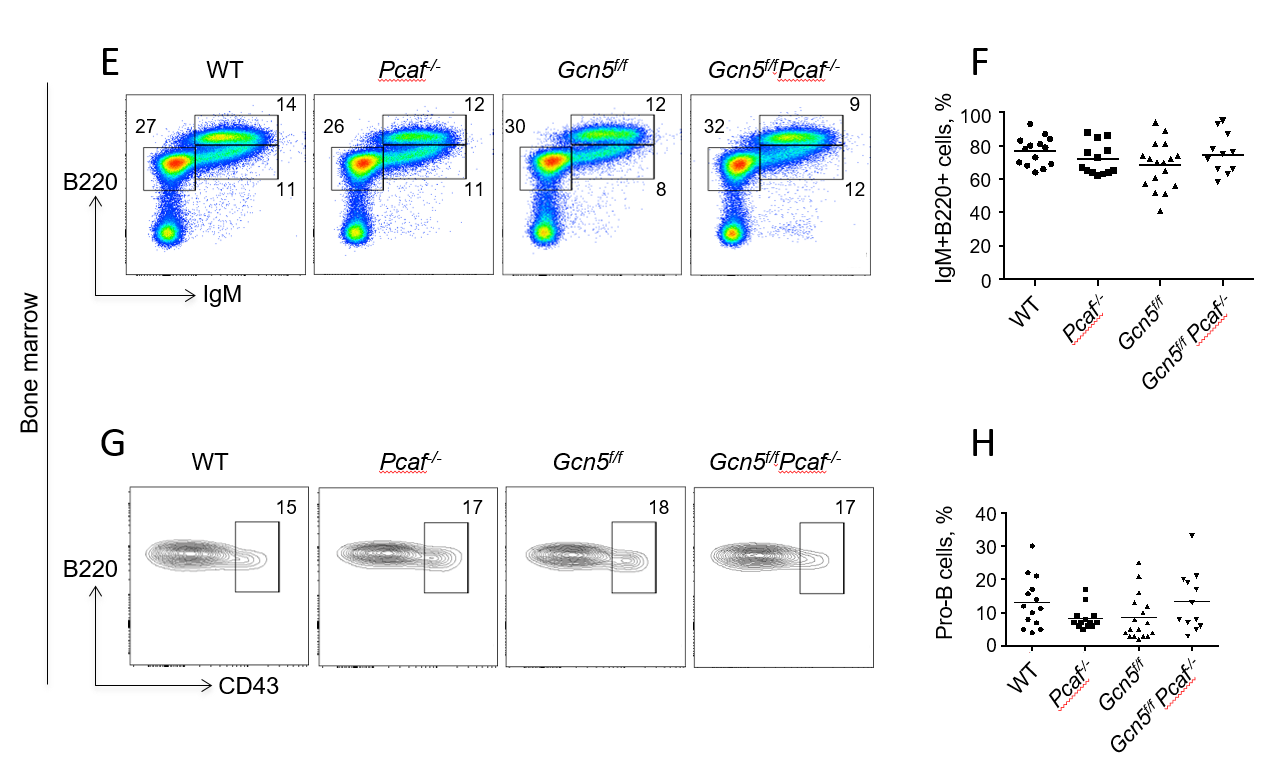
**

**Supplementary Figure S2. Detection of developing B cells in mice of indicated genotypes using flow cytometry**

(A) Example of flow cytometry detecting B220+IgM+ mature B cells in spleen.

(B) Summary of several experiments shown in (A).

(C) Example of flow cytometry detecting B220+ B cells and CD3+ T cells in blood.

(D) Summary of several experiments shown in (C).

(E) Example of flow cytometry detecting B220+IgM- and B200+IgM+ developing B cells in bone marrow.

(F) Summary of several experiments shown in (E).

(G) Example of flow cytometry detecting B220+IgM-CD43+ pro-B cells and B220+IgM-CD43- pre-B cells in bone marrow.

(H) Summary of several experiments shown in (G).
